# Supplementary material for: Transient Duplication-Dependent Divergence and Horizontal Transfer Underlie the Evolutionary Dynamics of Bacterial Cell–Cell Signaling
Source: PubMed Central journal article supplement (PMC5199041; doi:10.1371/journal.pbio.2000330), 2016-12-29

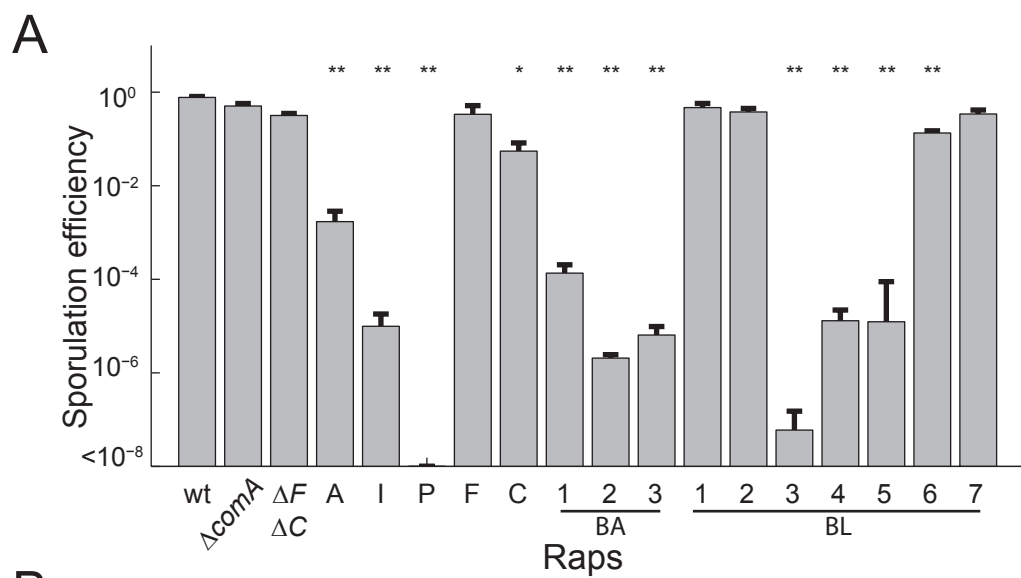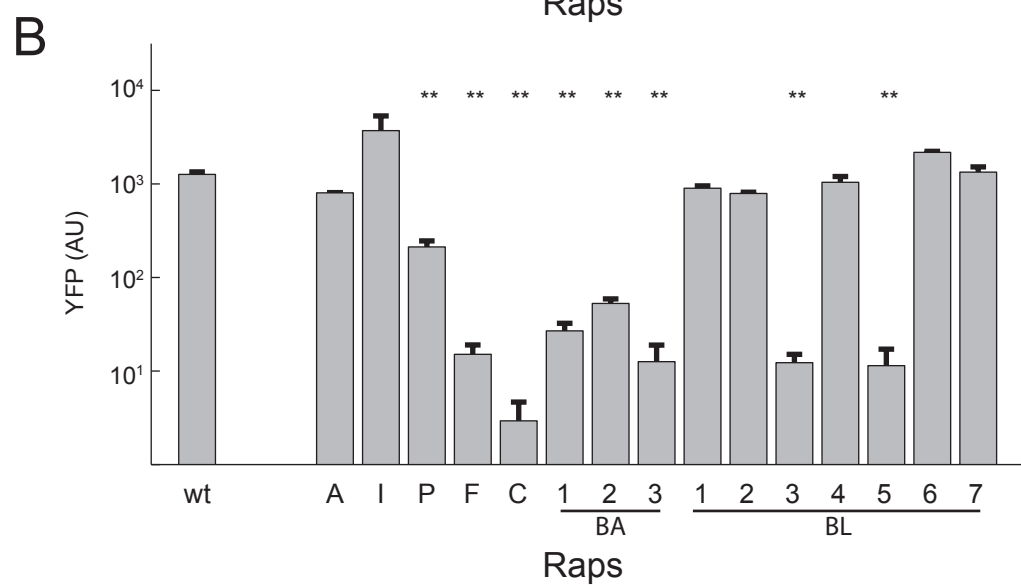

Supplement: pbio.2000330.s007.pdf [file pbio.2000330.s007.pdf]
