# Supplementary material for: Transient Duplication-Dependent Divergence and Horizontal Transfer Underlie the Evolutionary Dynamics of Bacterial Cell–Cell Signaling
Source: PLoS Biol. 2016 Dec 29;14(12):e2000330. doi: 10.1371/journal.pbio.2000330 (PMC5199041; doi:10.1371/journal.pbio.2000330)
Supplement: S5 Data — (XLSX) [file pbio.2000330.s019.xlsx]

## Sheet: Sporulation (Fig. 3A & S7 Fig)
Sporulation efficiency for Rap overexpression variants and few additional mutants
Used in Fig. 3A and S7 Fig.
	Sporulation efficiency (%)									log10(sporulation efficiecny)
Strain	repeat 1	repeat 2	repeat 3	repeat 4	repeat 5	repeat 6				repeat 1	repeat 2	repeat 3	repeat 4	repeat 5	repeat 6		mean(LOG10)	ste(log10)
wt (PY79)	70.9459	82.3684	79.0503							-0.149072	-0.0842393	-0.102097					-0.111803	0.0157867
BL3	4e-06	3.89105e-06	0	8.16327e-05						-7.39794	-7.40993	-8	-6.08814				-7.224	0.349749
BL7	32	54.6667	31.746	11.413	39.9485	78.4452	35.0299	26.5583		-0.49485	-0.262277	-0.498311	-0.942599	-0.3985	-0.105433		-0.450328	0.105885
BL2	15.4615	33.7019	50.2183	59.7403	53.7209	31.9588	41.0926			-0.810747	-0.472345	-0.299138	-0.223733	-0.269856	-0.49541		-0.428538	0.0810254
BL4	0.000265985	0.00272727	0.00325806	0.000232	0.00325806	0.00272727				-5.57514	-4.56427	-4.48704	-5.63451	-4.48704	-4.56427		-4.88538	0.208203
I	0.000498195	0.000353135	0.001	0.00541176						-5.3026	-5.45206	-5	-4.26666				-5.00533	0.228254
P	0	0	0	0						-8	-8	-8	-8				-8	0
ΔcomA	57.1429	44.7514								-0.243038	-0.349194						-0.296116	0.0375316
F	20.0641	13.5082	57.3529	82.716						-0.69758	-0.869403	-0.241444	-0.0824102				-0.472709	0.160808
C	5.78947	6.17544	1.90141	13.4831						-1.23736	-1.20933	-1.72092	-0.870209				-1.25946	0.151548
BA1	0.0244444	0.0168364	0.00270758	0.0168364	0.0244444					-3.61182	-3.77375	-4.56742	-3.77375	-3.61182			-3.86771	0.159776
BA3	0.00195545	0.000683168	0.000264706	0.000486486						-4.70875	-5.16547	-5.57724	-5.31293				-5.1911	0.157571
BL6	13.3333	11.1667	16.2162							-0.875061	-0.952076	-0.79005					-0.872396	0.0382054
BL5	2.41935e-05	0.01088	0.00721805							-6.6163	-3.96337	-4.14158					-4.90708	0.699048
BL1	25	71.25	45	38	74					-0.60206	-0.147215	-0.346787	-0.420216	-0.130768			-0.329409	0.0788769
BA2	0.000277174	0.000154255	0.000207317							-5.55725	-5.81176	-5.68336					-5.68412	0.0599899
ΔphrA	5.35714	7.13235	7.65625							-1.27107	-1.14677	-1.11598					-1.17794	0.0387053
A	0.136029	0.080556	0.455696							-2.86637	-3.0939	-2.34132					-2.7672	0.181946
Δ(RapFphrF)Δ(rapCphrC)	26	35.8333	34.375							-0.585027	-0.445713	-0.463757					-0.498166	0.035715
rapD	92	117								-0.0362122	0.0681859						0.0159868	0.0369103
rapJ	1.65049e-05	2.8e-05								-6.78239	-6.55284						-6.66762	0.0811569
rapB	0.0278947	0.231884								-3.55448	-2.63473						-3.0946	0.32518

## Sheet: ComA (Fig. 3A & S7 Fig)
PsrfA-YFP reporter activity for different Rap overexpression variants and several controls
Used in Fig. 3A and S7 Fig.
	Repeat #
ON in SMM diluted to OD0.1, grown for 4hrs and measured	1			2			3			4
Strains (Spo0A deletion background)	YFP	OD	YFP/OD	YFP	OD	YFP/OD	YFP	OD	YFP/OD	YFP	OD	YFP/OD		mean(YFP/OD)	ste(YFP/OD)
wt PY79	10230	0.389	26298.2	11280	0.489	23067.5	12110	0.495	24464.6	18209	0.626	29087.9		25729.5	1126.06
BL3	90	0.403	223.325	250	0.524	477.099	82	0.534	153.558					284.661	80.2652
BL5	92	0.408	225.49	38	0.437	86.9565	424	0.63	673.016					328.488	144.394
BL4	6434	0.298	21590.6	14373	0.522	27534.5	12214	0.542	22535.1					23886.7	1505.74
C	18	0.39	46.1538	10	0.438	22.8311	140	0.503	278.33					115.772	66.5915
F	70	0.429	163.17	272	0.527	516.129	180	0.517	348.162					342.487	83.2255
BL2	7306	0.404	18084.2	8744	0.5	17488	7718	0.455	16962.6					17511.6	264.521
I	85346	0.393	217165	10884	0.499	21811.6	55085	0.488	112879					117285	46080.4
BA2	360	0.45	800	658	0.678	970.501	622	0.684	909.357					893.286	40.7196
BL1	7374	0.413	17854.7	10132	0.454	22317.2	9758	0.496	19673.4					19948.4	1057.79
ΔphrA	8084	0.471	17163.5	7968	0.442	18027.1								17595.3	305.353
BL7	6528	0.577	11313.7	12766	0.499	25583.2	19716	0.618	31902.9	19411	0.622	31207.4		25001.8	4137.01
BA3	518	0.503	1029.82	64	0.329	194.529	60	0.317	189.274					471.208	228.056
P	1346	0.505	2665.35	2196	0.566	3879.86	3234	0.656	4929.88					3825.03	534.224
BL6	22544	0.674	33448.1	20982	0.598	35087								34267.5	579.433
BA1	168	0.477	352.201	232	0.527	440.228	498	0.485	1026.8					606.411	172.874
rapD	2024	0.355	5701.41	2500	0.376	6648.94								6175.17	335.002
rapJ	6934	0.363	19101.9	10718	0.412	26014.6								22558.2	2443.99
rapB	16097	0.531	30314.5	8740	0.332	26325.3								28319.9	1410.4

## Sheet: orphan Raps (Fig. 3C)
Sporulation measurments of orphan Raps - RapJ and RapB with addition of different Phr peptides (10µM unless otherwise noted)
PspoIIG-YFP mean expression in the population
Used in Fig. 3C
	Phr type
strain	no	K	P	F	C	A	BL6	BL5	BA3	BA2	BA1	BL3	I	BL1	BL4	phrC (100µM)
rapJ	1.44	1.39	1.39	1.39	1.39	1.39	1.38	1.37	1.37	1.37	1.37	1.37	1.32	1.37	1.34	6.7
rapB	1.35	1.71	1.69	1.71	1.89	1.71	1.71	1.73	1.74	1.73	1.73	1.65	1.69	1.68	1.68	4.02

## Sheet: Signal Matrix PsrfA (Fig. 3C)
Addition of 10µM Phr peptide variants to Rap overexpressing strains
Used in Fig. 3C
		Phr peptide
		no	F	C	I	P5	P6	BA2	BA3	BL3	BL2	BL4	BA1	BL6	BL5	BL1	A
PsrfA-YFP
	wt	23500	20500	11700	12200	104000	12500	11100	12000	10700	11400	11800	19100	24500	18700	17000	12000
	BA3	2200	854	374	382	488	624	1246	18200	678	288	484	536	4070	580	658	664
	F	36	6400	490	80	80	20	34	44	1	60	54	130	20	60	32	226
	C	160	280	10300	202	116	160	124	170	120	90	102	264	206	212	134	142
	BL3	386	430	414	414	444	390	526	554	24830	376	410	470	478	544	372	476
	BL5	94	154	126	240	178	240	186	156	210	204	146	1322	250	1162	212	304
	BA2	1020	814	896	746	634	702	26661	1266	684	610	594	728	794	750	752	668
	wt	4714	5926	2654	3340	4580	39150	2510	2650	3186	2560	2650	3950	2320	3058	2108	2374
	F	76	4948	88	52	74	112	82	94	4370	42	74	1002	40	88	96	74
	BL5	108	128	124	150	120	122	108	114	18	66	90	3780	354	1466	62	158
	BL3	384	344	328	368	368	354	386	322	17550	312	326	478	356	326	342	324
	P	78	54	212	54	2830	430	4	92	60	46	54	208	64	58	65	1
OD
	wt	0.27	0.28	0.245	0.278	0.267	0.28	0.216	0.231	0.219	0.233	0.246	0.237	0.264	0.298	0.27	0.197
	BA3	0.543	0.558	0.567	0.552	0.552	0.565	0.553	0.548	0.55	0.539	0.553	0.576	0.592	0.611	0.56	0.56
	F	0.309	0.308	0.369	0.297	0.337	0.342	0.327	0.311	0.334	0.331	0.31	0.312	0.346	0.35	0.324	0.316
	C	0.423	0.484	0.472	0.456	0.474	0.474	0.439	0.434	0.435	0.432	0.398	0.42	0.467	0.521	0.483	0.44
	BL3	0.495	0.484	0.544	0.487	0.465	0.466	0.471	0.455	0.461	0.47	0.46	0.452	0.517	0.508	0.473	0.497
	BL5	0.444	0.483	0.488	0.46	0.47	0.453	0.477	0.445	0.442	0.452	0.464	0.456	0.503	0.525	0.523	0.493
	BA2	0.525	0.523	0.513	0.53	0.498	0.506	0.509	0.523	0.494	0.503	0.5	0.516	0.508	0.539	0.533	0.616
	wt	0.155	0.154	0.168	0.153	0.158	0.155	0.138	0.148	0.156	0.15	0.151	0.147	0.16	0.162	0.155	0.153
	F	0.329	0.283	0.278	0.296	0.299	0.276	0.259	0.282	0.264	0.315	0.306	0.302	0.294	0.319	0.305	0.284
	BL5	0.438	0.442	0.423	0.448	0.435	0.446	0.404	0.464	0.284	0.415	0.453	0.389	0.427	0.44	0.445	0.426
	BL3	0.318	0.327	0.323	0.297	0.319	0.318	0.31	0.314	0.277	0.326	0.28	0.315	0.297	0.299	0.304	0.303
	P	0.373	0.367	0.341	0.383	0.386	0.359	0.338	0.394	0.371	0.37	0.357	0.386	0.392	0.408	0.402	0.41
YFP/OD
	wt	87037	73214.3	47755.1	43884.9	389513	44642.9	51388.9	51948.1	48858.4	48927	47967.5	80590.7	92803	62751.7	62963	60913.7
	BA3	4051.57	1530.47	659.612	692.029	884.058	1104.42	2253.16	33211.7	1232.73	534.323	875.226	930.556	6875	949.264	1175	1185.71
	F	116.505	20779.2	1327.91	269.36	237.389	58.4795	103.976	141.479	2.99401	181.269	174.194	416.667	57.8035	171.429	98.7654	715.19
	C	378.251	578.512	21822	442.982	244.726	337.553	282.46	391.705	275.862	208.333	256.281	628.571	441.113	406.91	277.433	322.727
	BL3	779.798	888.43	761.029	850.103	954.839	836.91	1116.77	1217.58	53861.2	800	891.304	1039.82	924.565	1070.87	786.469	957.746
	BL5	211.712	318.841	258.197	521.739	378.723	529.801	389.937	350.562	475.113	451.327	314.655	2899.12	497.018	2213.33	405.354	616.633
	BA2	1942.86	1556.41	1746.59	1407.55	1273.09	1387.35	52379.2	2420.65	1384.62	1212.72	1188	1410.85	1562.99	1391.47	1410.88	1084.42
	wt	30412.9	38480.5	15797.6	21830.1	28987.3	252581	18188.4	17905.4	20423.1	17066.7	17549.7	26870.7	14500	18876.5	13600	15516.3
	F	231.003	17484.1	316.547	175.676	247.492	405.797	316.602	333.333	16553	133.333	241.83	3317.88	136.054	275.862	314.754	260.563
	BL5	246.575	289.593	293.144	334.821	275.862	273.543	267.327	245.69	63.3803	159.036	198.675	9717.22	829.04	3331.82	139.326	370.892
	BL3	1207.55	1051.99	1015.48	1239.06	1153.61	1113.21	1245.16	1025.48	63357.4	957.055	1164.29	1517.46	1198.65	1090.3	1125	1069.31
	P	209.115	147.139	621.701	140.992	7331.61	1197.77	11.8343	233.503	161.725	124.324	151.261	538.86	163.265	142.157	161.692	2.43902

## Sheet: Signal Matrix PspoIIG (Fig. 3C)
Sporulation measurments of Rap variants that supress sporulation with addition of different Phr peptides (10µM unless otherwise noted)
PspoIIG-YFP mean expression in the population
Used in Fig. 3C
		Phr variant peptide
		no	F	C	I	P5	P6	BA2	BA3	BL3	BL2	BL4	BA1	BL6	BL5	BL1	A
	wt	25.1	27	30.6	29.5	26.4	28.4	27.7	27.9	27	28.4	27.4	27.6	26.7	27.2	27	30.2
	RapI	1.35	1.22	1.24	16.9	1.23	1.25	1.27	1.36	1.23	1.25	1.23	1.24	1.25	1.22	1.22	1.24
	ΔphrA	1.46	1.47	2.68	1.43	1.49	1.52	1.45	1.52	1.43	1.47	1.52	1.37	1.45	1.42	1.44	13.4
	BA1	1.64	1.59	1.98	1.56	1.46	1.59	1.54	1.54	1.54	1.59	1.58	65.1	1.62	1.53	1.6	1.53

## Sheet: RapK2 data (Fig. 4C)
Sporulation measurments of the RapK2 variants with no Phr or the addition of 10µM of either of the two PhrK2 autoinducer variants
PspoIIG-YFP mean expression in the population
Rap variants:	RapK2-KK			RapK2-RR			RapK2-KR
Peptides:	None	EKPVGT	ERPVGT	None	EKPVGT	ERPVGT	None	EKPVGT	ERPVGT
	1.48	5.55	1.4	1.75	1.66	16.9	1.91	1.76	27.3
	1.52	6.34	1.37	1.76	1.55	17.7	1.82	1.63	28.8
	1.95	7.29	1.76
	1.72	11.8	1.68
Average	1.6675	7.745	1.5525	1.755	1.605	17.3	1.865	1.695	28.05
Standard error	0.0933659	1.21043	0.085101	0.00353553	0.0388909	0.282843	0.0318198	0.0459619	0.53033

## Sheet: S5 Fig
Data for S5 Fig
From (fraction)	To (fraction)	Mobile clusters (based on %GC)	Core clusters (based on %GC)
0	0.1	24	4
0.1	0.2	15	2
0.2	0.3	4	0
0.3	0.4	5	0
0.4	0.5	2	1
0.5	0.6	4	1
0.6	0.7	1	0
0.7	0.8	1	0
0.8	0.9	2	1
0.9	1	3	17

## Sheet: Fig 2A
	Fraction of strains
# Rap variants	Cereus group	Subtilis group
1	0	0
2	0.0276	0
3	0.0691	0
4	0.0737	0
5	0.1567	0
6	0.1751	0
7	0.1935	0.0082
8	0.0876	0.0574
9	0.0553	0.2295
10	0.0415	0.1148
11	0.0276	0.2623
12	0.0184	0.1475
13	0.0276	0.082
14	0.0092	0.0328
15	0.0138	0.0574
16	0.0046	0
17	0	0
18	0.0138	0.0082
19	0	0
20	0.0046	0
21
